# Supplementary material
Source: Springer Nature journal article supplement (https://www.springermedizin.de/resource/supplementary/12888_2012_1303_MOESM2_ESM.pdf/9479830)

1. Control = mock-up general information-giving online resource
2. Psychoeducation = information-giving on psychosis specifically designed for siblings with CBT-orientated homework/practice tasks
3. Peer support = Siblings' discussion network with secured and moderated discussion boards on commonly encountered issues/ experiences and sharing experiences/ stories.
4. Psychoeducation & Peer support = combined conditions 2 and 3.

Advertising & Recruiting through EIPS & carer networks

Information giving & screening

Accepted - entering trial

Excluded  
Not meeting inclusion criteria or others

Informed consent  
Baseline assessment (T1)

Randomisation (N=144)

1. Control x 10 weeks (N=36)  
Post-test (T2)

2. Psychoeducation x 10 weeks (N=36)  
Post-test (T2)

3. Peer support X 10 weeks (N=36)  
Post-test (T2)

4. Combined x 10 weeks (N=36)  
Post-test (T2)

Lost to follow up  
Discontinued intervention

Follow-up at 20 weeks (T3)

Excluded from analysis

Data analysis

Lost to follow up  
Discontinued intervention

Follow-up at 20 weeks (T3)  
& 20% for interviews

Excluded from analysis

Data analysis

Enrolment

Allocation

Follow up

Analysis

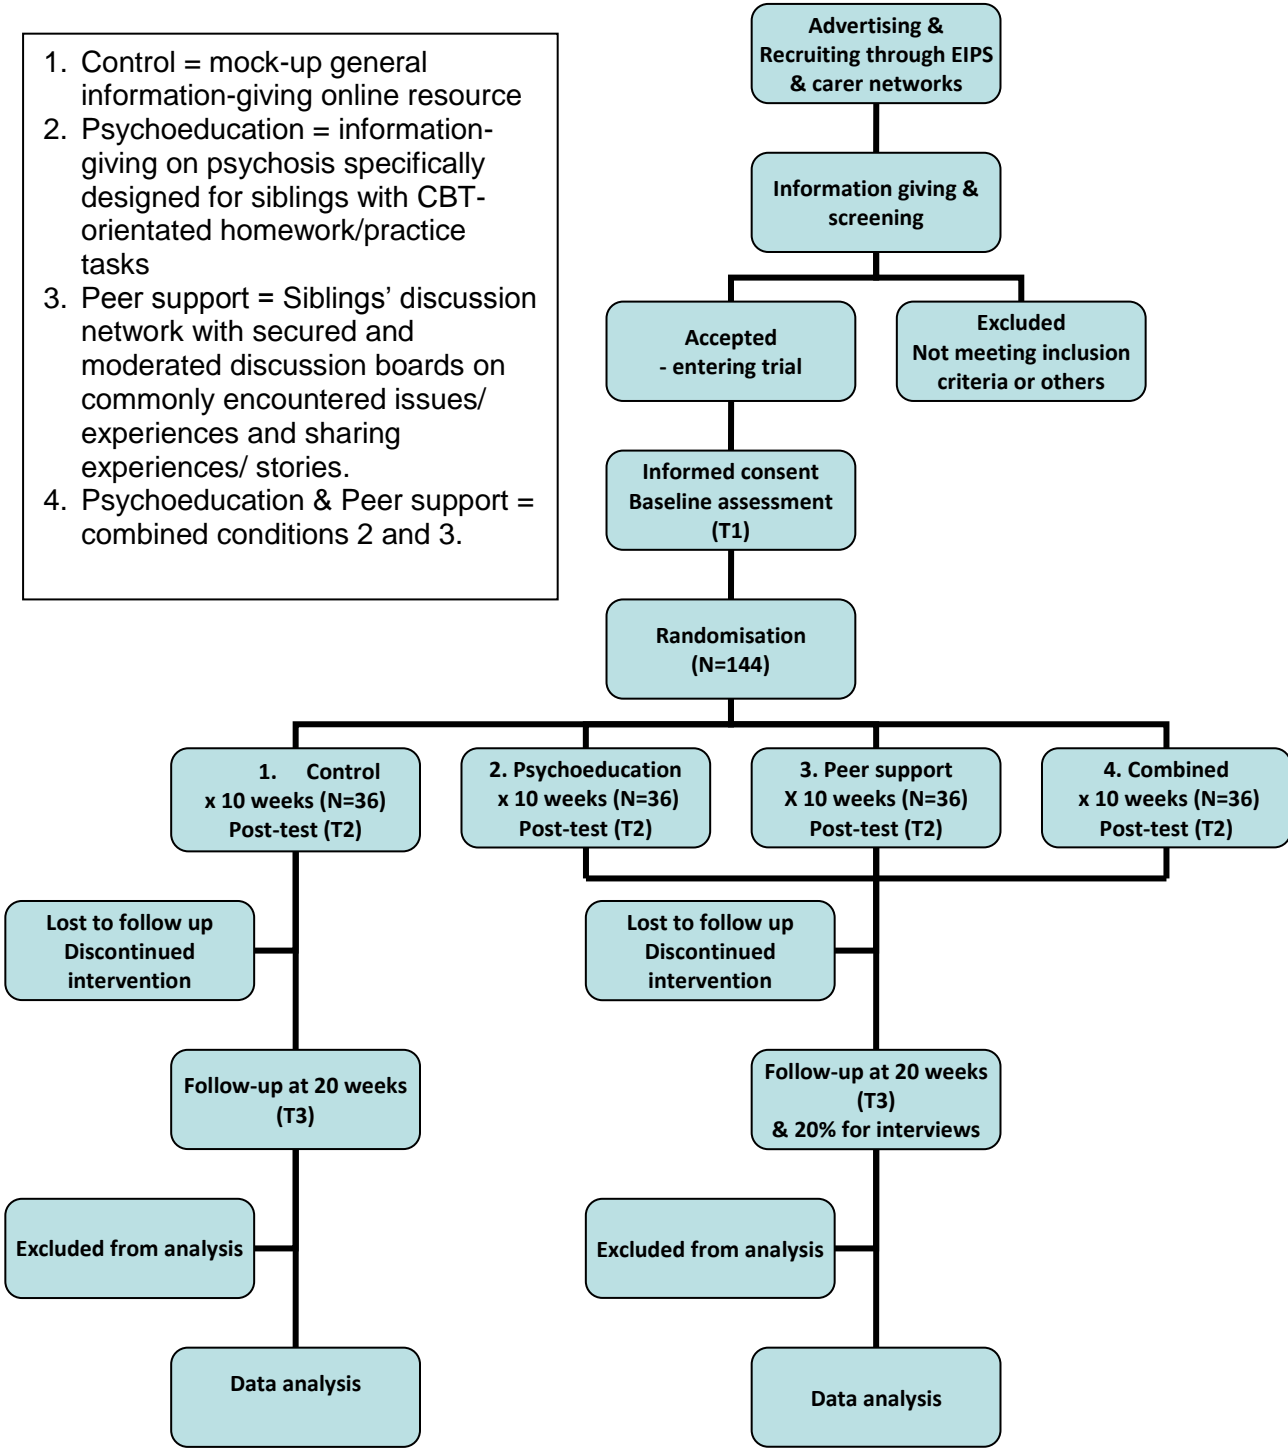

Supplement: MOESM2 [file 9479830]
